# Supplementary material for: Assimilating aerosol optical properties related to size andabsorption from POLDER/PARASOL with an ensemble dataassimilation system
Source: Copernicus journal article supplement (doi:10.5194/acp-2020-468), 2020-08-27
Supplement: Supplementary file 1 [file acp-2020-468-supplement.pdf]

## Supplementary

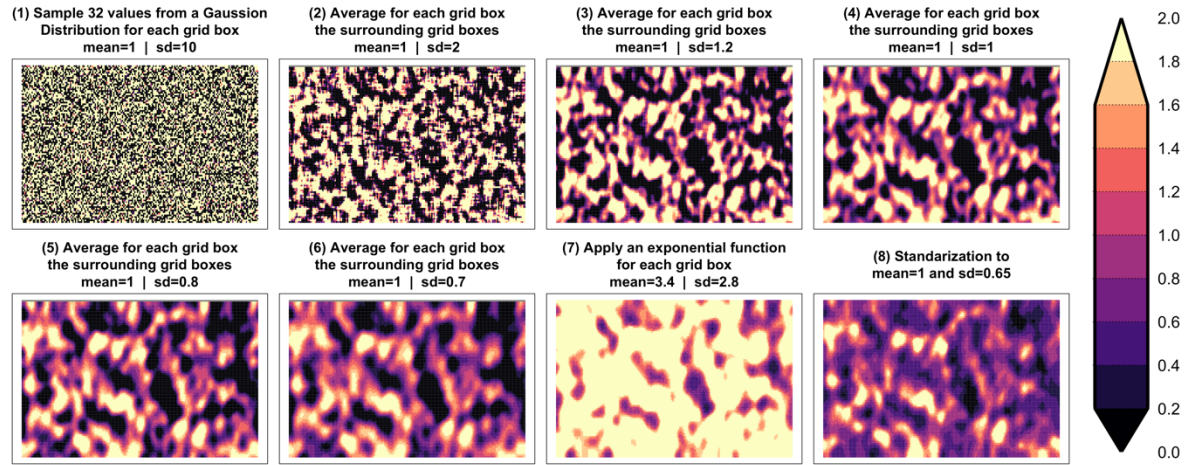

FigureS 1. Step by step the generation of the spatially correlated fields used to perturb aerosol emission and wind. Each plot depicts the spatial field of one member in different stages.

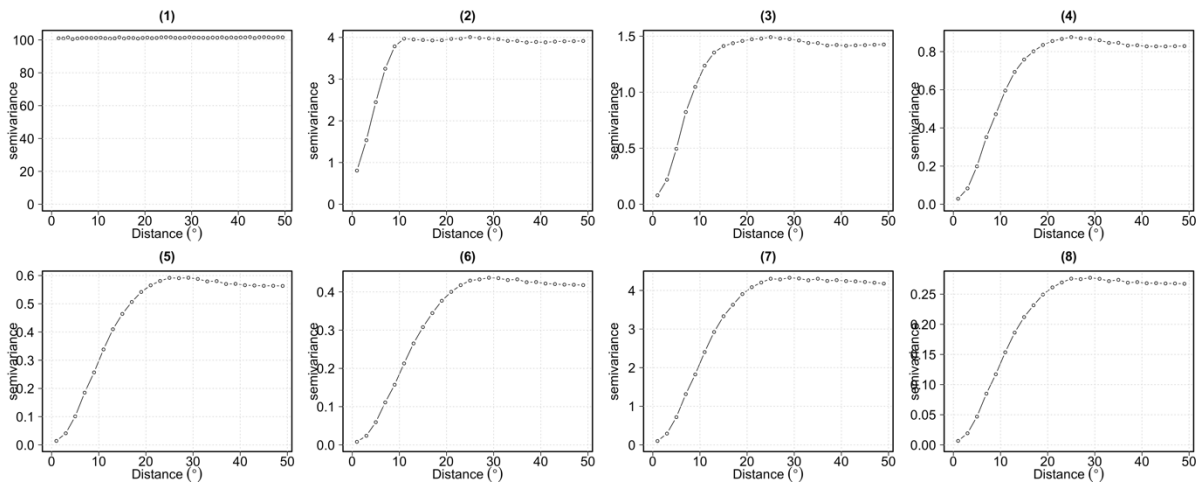

FigureS 2. Variogram for the respective spatial fields shown in FigureS 1.

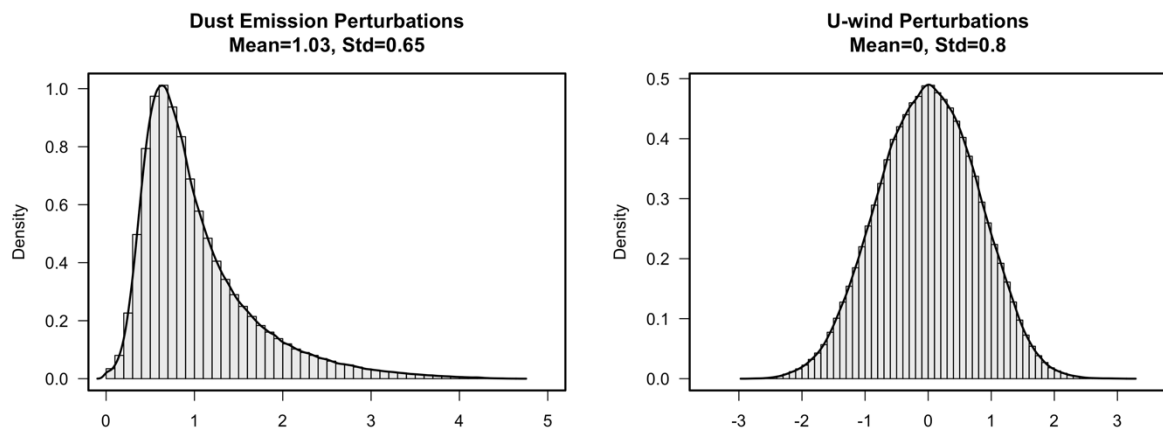

FigureS 3. Perturbations distribution for dust emission and U-component of the wind using all grid-box values.

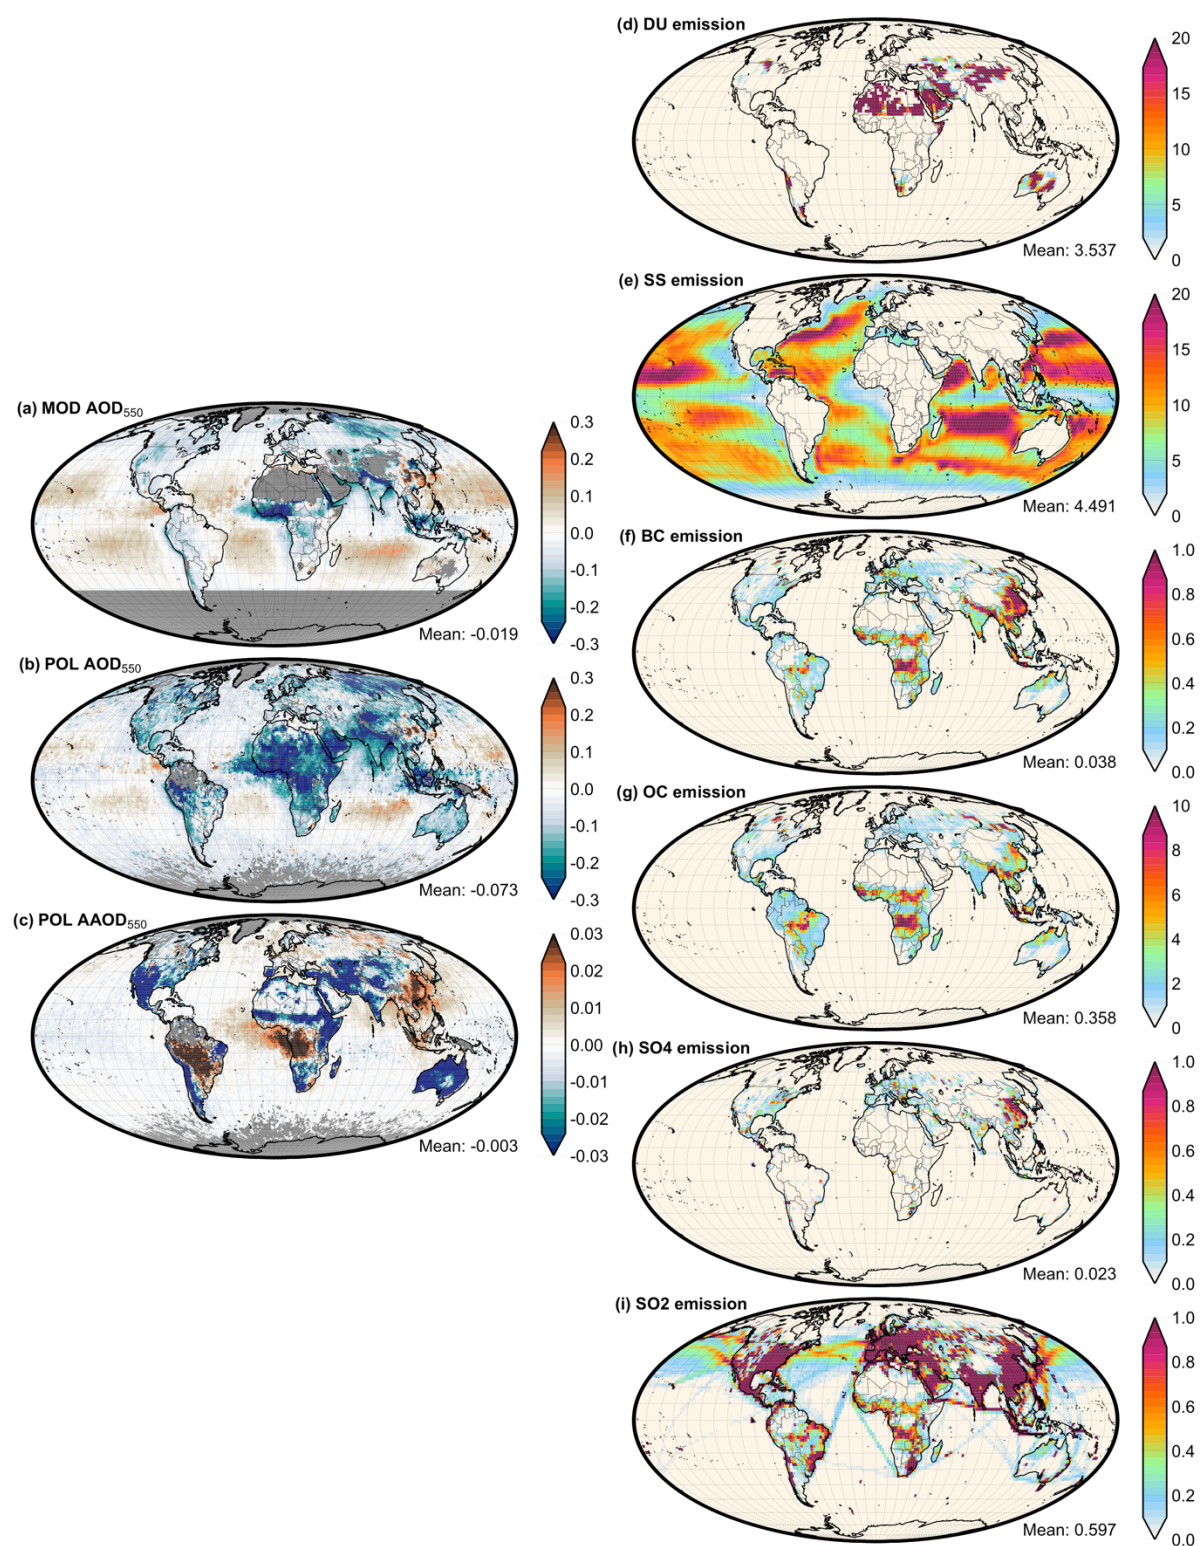

FigureS 4. ECHAM-HAM minus (a) MODIS-DT AOD<sub>550</sub>, (b) POLDER AOD<sub>550</sub> and POLDER AAOD<sub>550</sub> along with the emission fluxes ( $\text{kg}\cdot\text{km}^2\cdot\text{day}^{-1}$ ) of all aerosol species in the model (d-i) for 2006.

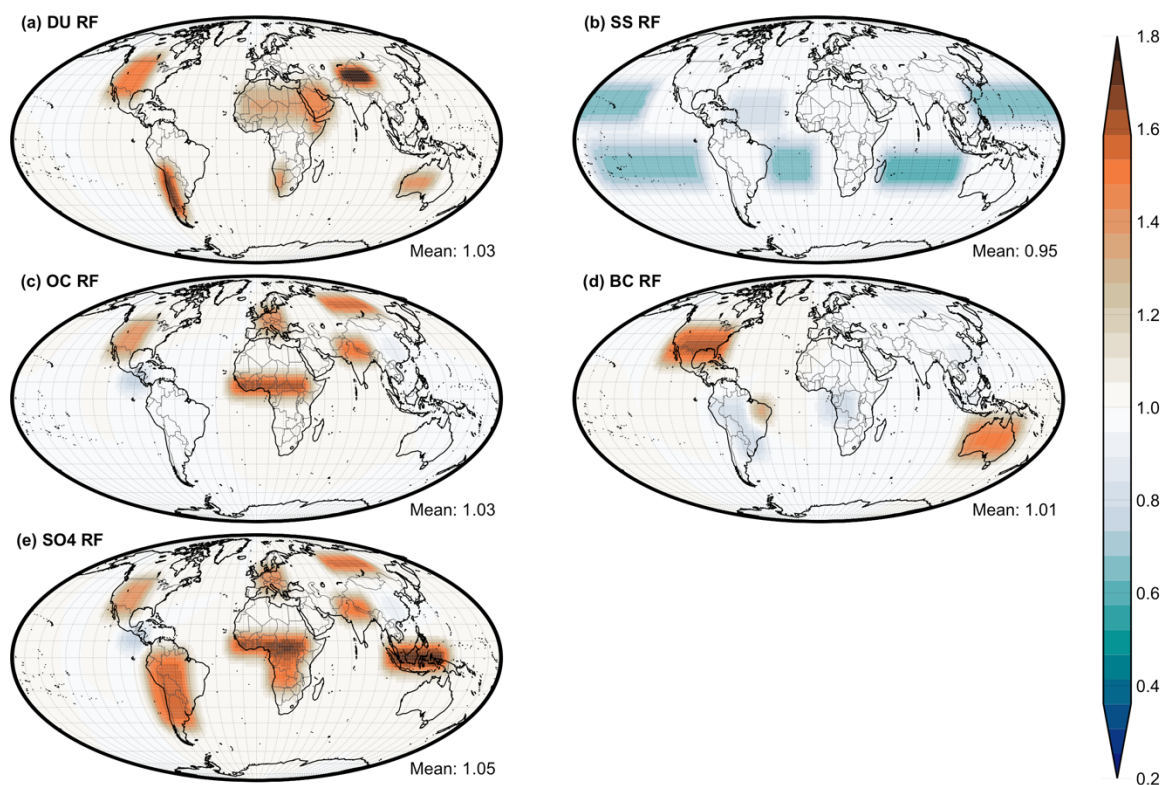

FigureS 5. Emission Rescaling Factors (RF) used in the experiments for (a) DU, (b) SS, (c) OC, (d) BC, (e) SO<sub>4</sub> and SO<sub>2</sub>.



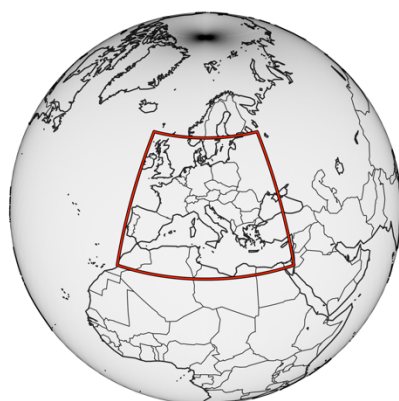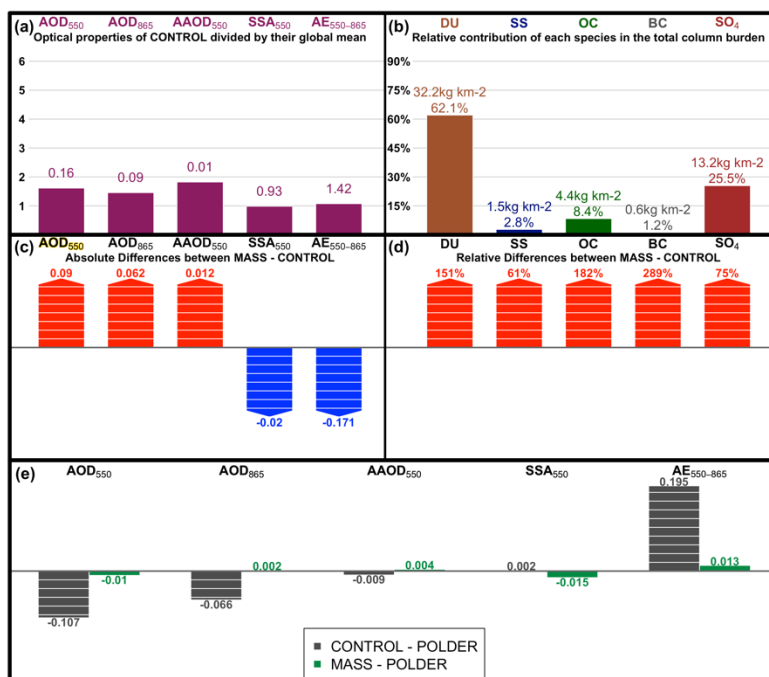

FigureS 6. An overview of the changes due to POLDER AOD<sub>550</sub> assimilation over Europe. (a) Depicts the mean values of five aerosol optical properties and the column burden of five aerosol species as simulated in the experiment MASS. The percentage in the column burdens of each species specifies the relative contribution of each species in the total column burden. (b) Illustrates the changes caused in aerosol optical properties and mixing ratio due to the assimilation of AOD<sub>550</sub> (MASS – CONTROL). (c) Displays the aerosol optical properties bias in comparison to POLDER for the experiments CONTROL and MASS.

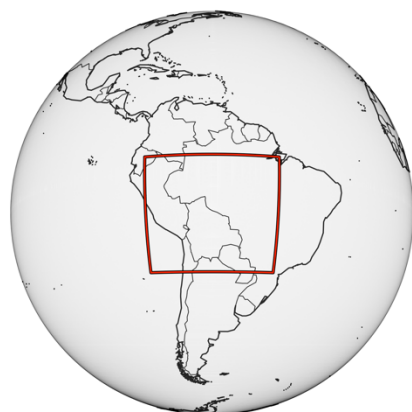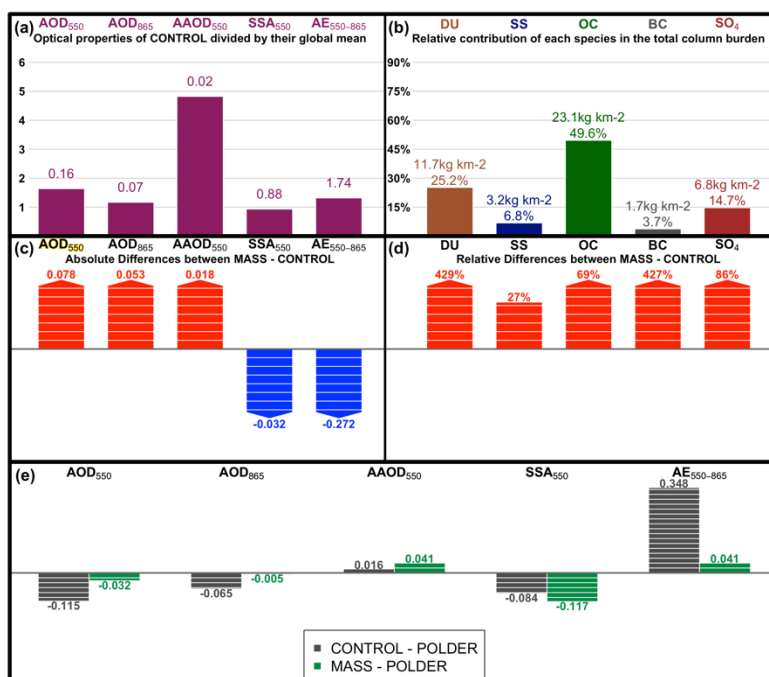

FigureS 7. An overview of the changes due to POLDER AOD<sub>550</sub> assimilation over South America. (a) Depicts the mean values of five aerosol optical properties and the column burden of five aerosol species as simulated in the experiment MASS. The percentage in the column burdens of each species specifies the relative contribution of each species in the total column burden. (b) Illustrates the changes caused in aerosol optical properties and mixing ratio due to the assimilation of AOD<sub>550</sub> (MASS – CONTROL). (c) Displays the aerosol optical properties bias in comparison to POLDER for the experiments CONTROL and MASS.

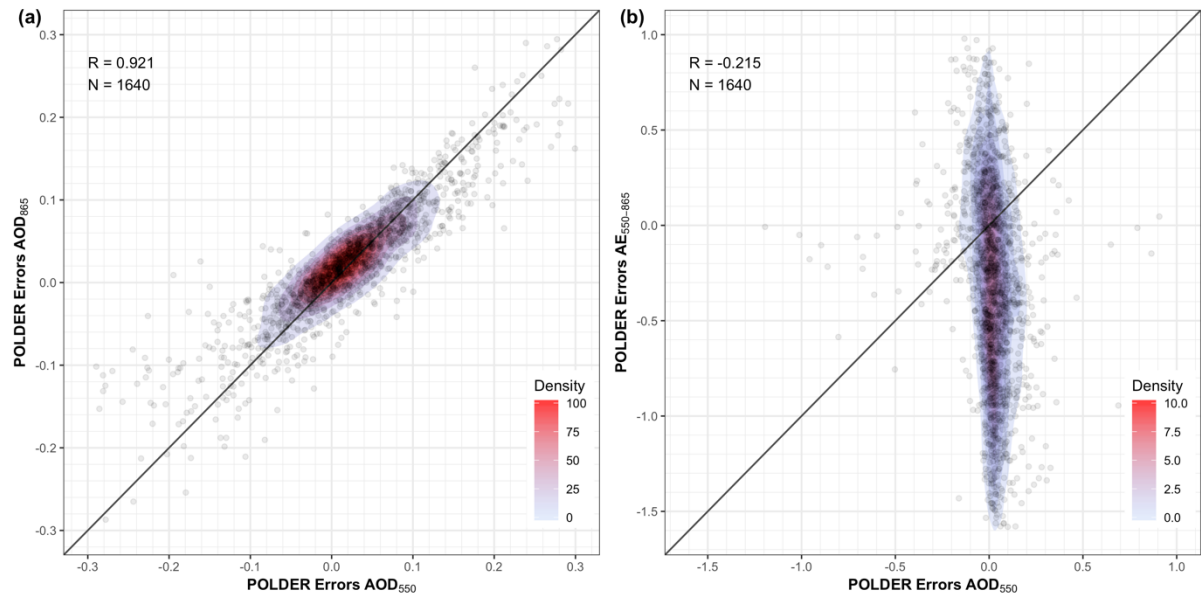

FigureS 8. POLDER errors estimated by comparing it with AERONET for (a) AOD<sub>550</sub> against AOD<sub>865</sub> and for (b) AOD<sub>550</sub> against AE<sub>550-865</sub>. R denotes Pearson Correlation.

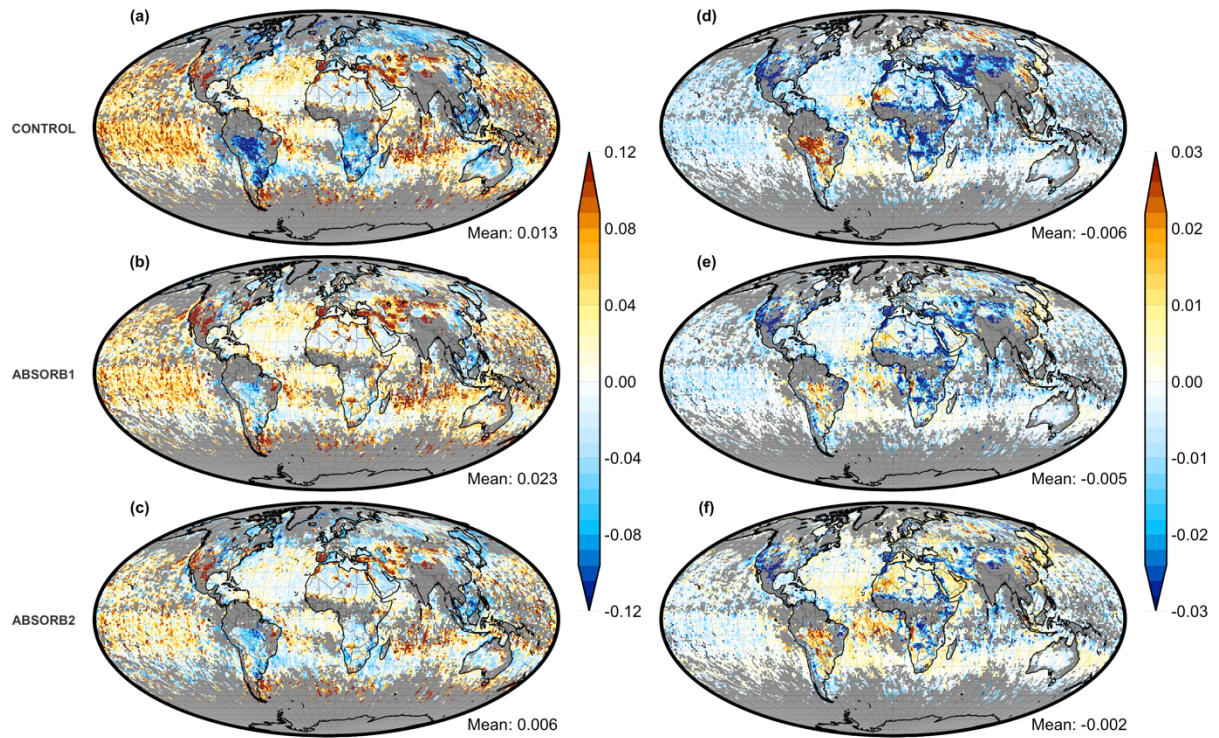

FigureS 9. Differences between the experiments CONTROL (a,d), ABSORB1 (b,e) and ABSORB2 (c,f) and POLDER for AAOD<sub>550</sub> and SSA<sub>550</sub>. All fields are spatiotemporally collocated to the available measurements of POLDER for the period 20<sup>th</sup> of July to 28<sup>th</sup> of August 2006. Grey-filled grid cells indicate the absence of any valid POLDER measurements for the study period.

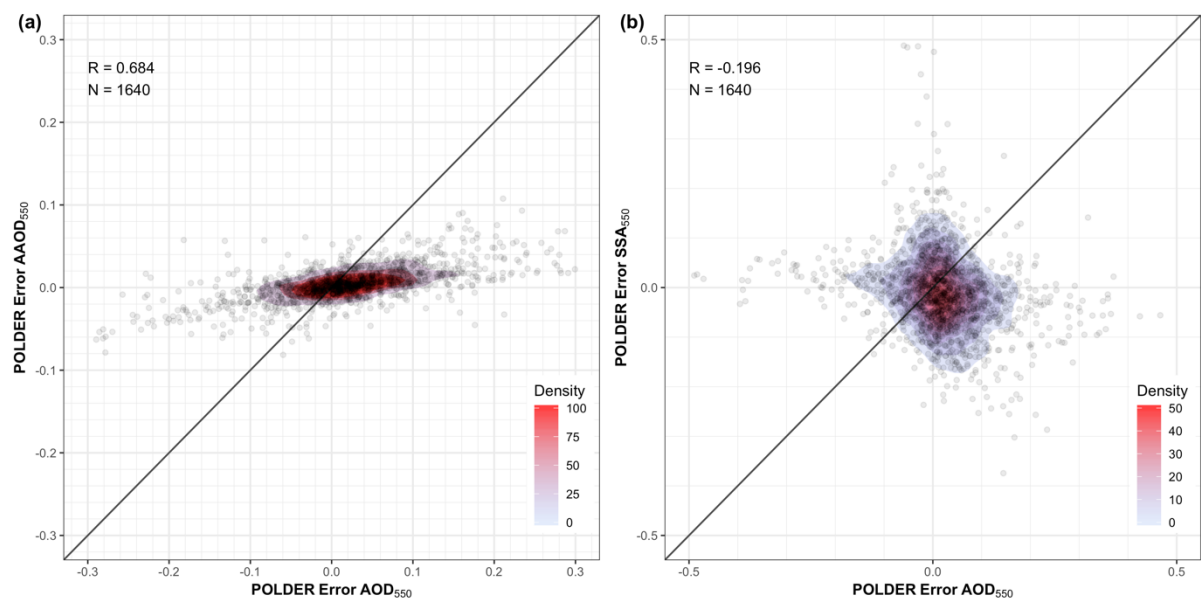

FigureS 10. POLDER errors estimated by comparing it with AERONET for (a) AOD<sub>550</sub> against AAOD<sub>865</sub> and for (b) AOD<sub>550</sub> against SSA<sub>550</sub>. R denotes Pearson Correlation.
